# Supplementary material for: Simple Techniques for Antegrade Guiding Catheter Engagement after Retrograde CTO Crossing
Source: J Interv Cardiol. 2020 May 23;2020:7432831. doi: 10.1155/2020/7432831 (PMC7271058; doi:10.1155/2020/7432831)
Supplement: Supplementary Materials — Video 1. Aortic catch-it: while the antegrade guide is kept against the aortic roof, the retrograde wire is advanced into its tip. Video 2. Wire trapping: the retrograde wire is trapped by a balloon inside the antegrade guide to provide support and advance the antegrade guide catheter down to the ostium of the RCA. Video 3. Microcatheter advancement into the antegrade guide: exploiting the support provided by the inflated trapping balloon, the retrograde microcatheter is advanced through the occlusion into the distal tip of the antegrade guide. Video 4. Antegrade microcatheter probing: advancement of an antegrade guidewire inside the retrograde microcatheter. [file 7432831.f1.zip]

Archive with 4 entries (4 files):
- 7432831.f1/Video1.mp4
- 7432831.f1/Video2.mp4
- 7432831.f1/Video3.mp4
- 7432831.f1/Video4.mp4
